# Supplementary material for: Association between Breastfeeding and Restrictive Spirometric Pattern in Women Aged over 40 Years: A Cross-Sectional Study
Source: MDPI journal article supplement (doi:10.3390/ijerph192316291), 2022-12-05
Supplement: s1 [file s1]

Table S1. Demographic characteristics of participants according to Breastfeeding

| Variables                     | Total (n)                  |      | Breastfeeding Ever         |      | Breastfeeding Never        |      | <i>P-value</i> |
|-------------------------------|----------------------------|------|----------------------------|------|----------------------------|------|----------------|
|                               | n                          | %    | n                          | %    | n                          | %    |                |
|                               | 9261                       |      | 7933                       | 85.7 | 1328                       | 14.3 |                |
| <b>Age (years)</b>            | 57.5 (10.7) <sup>†</sup>   |      | 58.3 (10.7) <sup>†</sup>   |      | 52.3 (8.6) <sup>†</sup>    |      | <0.0001        |
| 40-49                         | 2519                       | 27.2 | 1936                       | 76.9 | 583                        | 23.1 |                |
| 50-59                         | 2925                       | 31.6 | 2421                       | 82.8 | 504                        | 17.2 |                |
| 60-69                         | 2306                       | 24.9 | 2136                       | 92.6 | 170                        | 7.4  |                |
| 70-79                         | 1369                       | 14.8 | 1305                       | 95.3 | 64                         | 4.7  |                |
| 80+                           | 142                        | 1.5  | 135                        | 95.1 | 7                          | 4.9  |                |
| <b>BMI (kg/m2)</b>            | 24.0 (3.2) <sup>†</sup>    |      | 24.1 (3.2) <sup>†</sup>    |      | 23.4 (3.3) <sup>†</sup>    |      | <0.0001        |
| Underweight                   | 189                        | 2.0  | 143                        | 75.7 | 46                         | 24.3 |                |
| Obese                         | 3127                       | 33.8 | 2783                       | 89.0 | 344                        | 11.0 |                |
| Normal                        | 5945                       | 64.2 | 5007                       | 84.2 | 938                        | 15.8 |                |
| <b>FEV1 (L)</b>               | 2.30 (0.45) <sup>†</sup>   |      | 2.28 (0.45) <sup>†</sup>   |      | 2.41 (0.44) <sup>†</sup>   |      |                |
| <b>FVC (L)</b>                | 2.91 (0.51) <sup>†</sup>   |      | 2.89 (0.51) <sup>†</sup>   |      | 3.02 (0.51) <sup>†</sup>   |      |                |
| <b>FVC Percentage (%)</b>     | 92.76 (11.58) <sup>†</sup> |      | 92.76 (11.57) <sup>†</sup> |      | 92.75 (11.67) <sup>†</sup> |      |                |
| <b>FEV1/FVC</b>               | 0.79 (0.06) <sup>†</sup>   |      | 0.79 (0.06) <sup>†</sup>   |      | 0.80 (0.05) <sup>†</sup>   |      |                |
| <b>Smoking status</b>         |                            |      |                            |      |                            |      | <0.0001        |
| Ever (less than 100)          | 76                         | 0.8  | 65                         | 85.5 | 11                         | 14.5 |                |
| Ever (more than 100)          | 619                        | 6.7  | 484                        | 78.2 | 135                        | 21.8 |                |
| Never                         | 8566                       | 92.5 | 7384                       | 86.2 | 1182                       | 13.8 |                |
| <b>Asthma</b>                 |                            |      |                            |      |                            |      | 0.8655         |
| Diagnosed                     | 307                        | 3.3  | 264                        | 86.0 | 43                         | 14.0 |                |
| Never diagnosed               | 8954                       | 96.7 | 7669                       | 85.6 | 1285                       | 14.4 |                |
| <b>Pulmonary tuberculosis</b> |                            |      |                            |      |                            |      | 0.0487         |
| Diagnosed                     | 326                        | 3.5  | 267                        | 81.9 | 59                         | 18.1 |                |
| Never diagnosed               | 8935                       | 96.5 | 7666                       | 85.8 | 1269                       | 14.2 |                |
| <b>Hypertension</b>           |                            |      |                            |      |                            |      | <0.0001        |
| Diagnosed                     | 2515                       | 27.2 | 2294                       | 91.2 | 221                        | 8.8  |                |
| Never diagnosed               | 6746                       | 72.8 | 5639                       | 83.6 | 1107                       | 16.4 |                |
| <b>Diabetes Mellitus</b>      |                            |      |                            |      |                            |      | 0.0002         |
| Diagnosed                     | 860                        | 9.3  | 773                        | 89.9 | 87                         | 10.1 |                |
| Never diagnosed               | 8401                       | 90.7 | 7160                       | 85.2 | 1241                       | 14.8 |                |
| <b>Region</b>                 |                            |      |                            |      |                            |      | <0.0001        |
| Capital                       | 4366                       | 47.1 | 3673                       | 84.1 | 693                        | 15.9 |                |
| Non-Capital                   | 4895                       | 52.9 | 4260                       | 87.0 | 635                        | 13.0 |                |
| <b>Employment status</b>      |                            |      |                            |      |                            |      | <0.0001        |
| Blue-collar worker            | 1863                       | 20.1 | 1678                       | 90.1 | 185                        | 9.9  |                |
| White-collar worker           | 2900                       | 31.3 | 2362                       | 81.4 | 538                        | 18.6 |                |
| Unemployed                    | 4498                       | 48.6 | 3893                       | 86.5 | 605                        | 13.5 |                |
| <b>Education level</b>        |                            |      |                            |      |                            |      | <0.0001        |

|                                  |                         |      |                         |      |                         |      |         |
|----------------------------------|-------------------------|------|-------------------------|------|-------------------------|------|---------|
| Elementary or lower              | 2863                    | 30.9 | 2713                    | 94.8 | 150                     | 5.2  |         |
| Middle school                    | 1334                    | 14.4 | 1231                    | 92.3 | 103                     | 7.7  |         |
| High school                      | 3054                    | 33.0 | 2462                    | 80.6 | 592                     | 19.4 |         |
| College or higher                | 2010                    | 21.7 | 1527                    | 76.0 | 483                     | 24.0 |         |
| <b>House income level</b>        |                         |      |                         |      |                         |      | <0.0001 |
| Very low                         | 1940                    | 20.9 | 1779                    | 91.7 | 161                     | 8.3  |         |
| Low                              | 2340                    | 25.3 | 2045                    | 87.4 | 295                     | 12.6 |         |
| High                             | 2329                    | 25.1 | 1955                    | 83.9 | 374                     | 16.1 |         |
| Very high                        | 2652                    | 28.6 | 2154                    | 81.2 | 498                     | 18.8 |         |
| <b>Parity</b>                    |                         |      |                         |      |                         |      | <0.0001 |
| Primipara                        | 347                     | 3.7  | 238                     | 68.6 | 109                     | 31.4 |         |
| Multipara                        | 8914                    | 96.3 | 7695                    | 86.3 | 1219                    | 13.7 |         |
| <b>Age at menarche</b>           | 14.6 (1.9) <sup>†</sup> |      | 14.7 (1.9) <sup>†</sup> |      | 14.0 (1.8) <sup>†</sup> |      | <0.0001 |
| < 15 years                       | 4850                    | 52.4 | 3948                    | 81.4 | 902                     | 18.6 |         |
| ≥ 15 years                       | 4411                    | 47.6 | 3985                    | 90.3 | 426                     | 9.7  |         |
| <b>Age at the first delivery</b> | 25.0 (3.9) <sup>†</sup> |      | 24.7 (3.8) <sup>†</sup> |      | 26.9 (4.0) <sup>†</sup> |      | <0.0001 |
| < 25 years                       | 4541                    | 49.0 | 4187                    | 92.2 | 354                     | 7.8  |         |
| ≥ 25 years                       | 4720                    | 51.0 | 3746                    | 79.4 | 974                     | 20.6 |         |
| <b>Age at the last delivery</b>  | 29.5 (4.3) <sup>†</sup> |      | 29.4 (4.3) <sup>†</sup> |      | 29.8 (4.1) <sup>†</sup> |      | 0.0002  |
| < 30 years                       | 5093                    | 55.0 | 4426                    | 86.9 | 667                     | 13.1 |         |
| ≥ 30 years                       | 4168                    | 45.0 | 3507                    | 84.1 | 661                     | 15.9 |         |
| <b>Examined year</b>             |                         |      |                         |      |                         |      | 0.9693  |
| 2013                             | 1478                    | 16.0 | 1266                    | 85.7 | 212                     | 14.3 |         |
| 2014                             | 1413                    | 15.3 | 1214                    | 85.9 | 199                     | 14.1 |         |
| 2015                             | 1455                    | 15.7 | 1250                    | 85.9 | 205                     | 14.1 |         |
| 2016                             | 1687                    | 18.2 | 1435                    | 85.1 | 252                     | 14.9 |         |
| 2017                             | 1551                    | 16.7 | 1325                    | 85.4 | 226                     | 14.6 |         |
| 2018                             | 1677                    | 18.1 | 1443                    | 86.0 | 234                     | 14.0 |         |

<sup>†</sup>Values are presented as mean (SE)
